# Supplementary material for: Antagonism of Estrogen Receptor α-Driven Transcription Mediated by AP-1 in Breast Cancer Therapy
Source: MDPI journal article supplement (doi:10.3390/endocrines5010007), 2024-03-06
Supplement: s1 [file s1]

## Supplement Materials

Suppl Mat. Figure S1

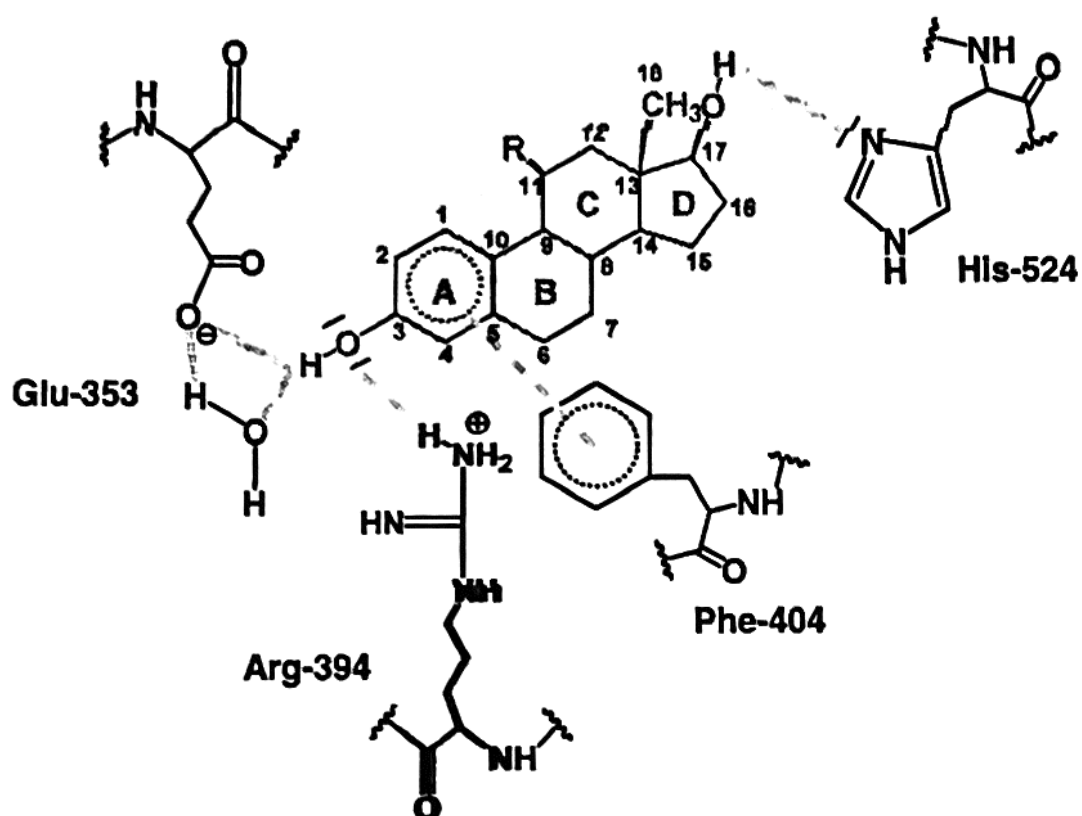

### Estradiol / Estrogen Receptor $\alpha$ Complexion

Stabilizing Interactions between residues of the receptor ligand binding pocket and chemical functions of the hormone

**Suppl. Mat. Figure S2**

Illustration of the transformation of the SERM RU 39 411 ( steroidal analog of Hydroxy -Tamoxifen ) in the SERD RU58 668 by the substitution of its side-chain by an almost identical side-chain of 7 $\alpha$ -Fulvestrant

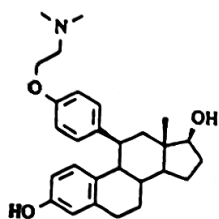

**RU 39 411**

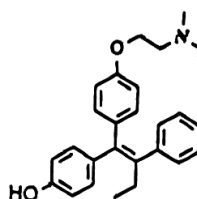

**HYDROXY-TAMOXIFEN**

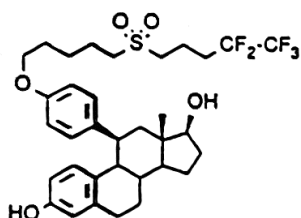

**RU 58 668**

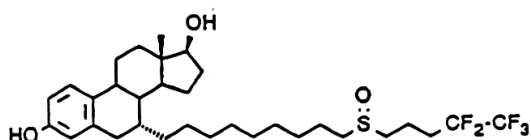

**7 $\alpha$ -Fulvestrant**

**Suppl. Mat. Table S1**

**Influence of 11 $\beta$  - E<sub>2</sub> derivatives on MCF-7 cell proliferation**

**% Control**

| <b>(log Molarity)</b> | <b>E<sub>2</sub></b> | <b>11<math>\beta</math> -C<sub>6</sub>H<sub>13</sub></b> | <b>11<math>\beta</math> -C<sub>6</sub>F<sub>13</sub></b> | <b>11<math>\beta</math>-C<sub>2</sub>H<sub>4</sub>- C<sub>4</sub>F<sub>9</sub></b> |
|-----------------------|----------------------|----------------------------------------------------------|----------------------------------------------------------|------------------------------------------------------------------------------------|
| <b>-11</b>            | <b>459 16 *</b>      | <b>189 6</b>                                             | <b>131 3</b>                                             | <b>94 7</b>                                                                        |
| <b>- 10</b>           | <b>533 9</b>         | <b>380 13</b>                                            | <b>320 11</b>                                            | <b>89 4</b>                                                                        |
| <b>- 9</b>            | <b>539 9</b>         | <b>270 9</b>                                             | <b>470 11</b>                                            | <b>141 7</b>                                                                       |
| <b>- 8</b>            | <b>523 16</b>        | <b>188 3</b>                                             | <b>461 23</b>                                            | <b>97 4</b>                                                                        |
| <b>- 7</b>            | <b>518 17</b>        | <b>200 18</b>                                            | <b>460 19</b>                                            | <b>92 3</b>                                                                        |

---

**\*= SD**

**Proliferation assessment in 96 wells microtitration plates by a crystal violet procedure (3 days of culture)**
